**Title: Activity-dependent long-term potentiation of electrical synapses in the mammalian thalamus**

Running title: LTP of electrical synapses

Summary: Long-term potentiation results from spiking in one cell of an electrically coupled pair. Asymmetry of synapses increases following unidirectional activity. We suggest a calcium-based rule for electrical synapse plasticity.

Authors: Brandon Fricker<sup>1</sup>, Emily Heckman<sup>1,2</sup>, Patrick C. Cunningham<sup>1</sup>, and Julie S. Haas<sup>1,\*</sup>

Affiliations: 1. Department of Biological Sciences, Lehigh University  
111 Research Drive  
Bethlehem, PA 18015

2. Present address: Institute of Neuroscience, Department of Biology,  
University of Oregon,  
1254 University of Oregon,  
Eugene, OR 97403

\*to whom correspondence should be addressed: [julie.haas@lehigh.edu](mailto:julie.haas@lehigh.edu)

Keywords: activity dependent plasticity, electrical synapse, gap junction, LTP, asymmetry

Acknowledgements: Bruce Bean (Harvard) generously supplied TTA-A2. We thank C. E. Landisman, R. M. Burger, T. Pham and all Haas lab members for input on drafts of this manuscript. Funding was provided by the NSF (IOS 1557474), the Whitehall Foundation, and the Brain & Behavior Foundation.

## 2 **Abstract**

3           Activity-dependent changes of synapse strength have been extensively characterized at  
4 chemical synapses, but the relationship between physiological forms of activity and strength at  
5 electrical synapses remains poorly understood. For mammalian electrical synapses composed  
6 of hexomers of connexin36, physiological forms of neuronal activity in coupled pairs has thus far  
7 have only been linked to long-term depression; activity that results in strengthening of electrical  
8 synapses has not yet been identified. The thalamic reticular nucleus (TRN), a central brain area  
9 primarily connected by gap junctional (electrical) synapses, regulates cortical attention to the  
10 sensory surround. Bidirectional plasticity of electrical synapses may be a key mechanism  
11 underlying these processes in both healthy and diseased states. Here we show in electrically  
12 coupled TRN pairs that tonic spiking in one neuron results in long-term potentiation of electrical  
13 synapses between coupled pairs of TRN neurons. Potentiation is expressed asymmetrically,  
14 indicating that regulation of connectivity depends on the direction of use. Further, potentiation  
15 depends on calcium flux, and we thus propose a calcium-based activity rule for bidirectional  
16 plasticity of electrical synapse strength. Because electrical synapses dominate intra-TRN  
17 connectivity, these synapses and their modifications are key regulators of thalamic attention  
18 circuitry. More broadly, bidirectional modifications of electrical synapses are likely to be a  
19 widespread and powerful principle for ongoing, dynamic reorganization of neuronal circuitry  
20 across the brain.

21

## 22 Introduction

23 The thalamic reticular nucleus (TRN) is a central brain region exclusively comprising  
24 inhibitory neurons that gate the bidirectional flow of information between thalamus and cortex,  
25 and ultimately regulate the cognitive process of attention (Halassa et al., 2014; Kimura, 2014;  
26 McAlonan et al., 2006; Sherman, 2016; Zikopoulos & Barbas, 2012). Like all thalamic neurons,  
27 TRN neurons fire action potentials in two modes (Contreras et al., 1992). Bursts, which feature  
28 a slow calcium spike from a T-type calcium current (Huguenard & Prince, 1992) crowned by a  
29 fast barrage of sodium spikes, dominate TRN activity during slow sleep rhythms (Crunelli et al.,  
30 2006; Destexhe et al., 1996; Huguenard & Prince, 1992; McCormick & Bal, 1997; Steriade et  
31 al., 1993), are a feature of *absence* epilepsy (Fuentelba & Steriade, 2005), and are reduced in  
32 schizophrenics (Ferrarelli & Tononi, 2011). Regular tonic spikes, in contrast, are prevalent  
33 during attentive behaviors (Pinault, 2004). Because the main mode of intra-TRN communication  
34 is its dense electrical synapses (Hou et al., 2016; Landisman et al., 2002), understanding how  
35 and when electrical synapses change in strength during these two modes of activity is key for  
36 understanding attention processes and rhythm generation.

37 In the mature mammalian brain, electrical synapses are composed of paired hexomers  
38 of connexin36 that pass ions and small molecules, and mainly couple inhibitory GABAergic  
39 neurons (Bennett & Zukin, 2004; Connors & Long, 2004; Galarreta & Hestrin, 2001). Electrical  
40 synapses contribute to synchrony in coupled networks (Chow & Kopell, 2000; Destexhe, 1998;  
41 Draguhn et al., 1998; Gutierrez et al., 2013; Haas & Landisman, 2012; Pernelle et al., 2018;  
42 Pfeuty et al., 2005; Wang & Rinzel, 1993; Whittington & Traub, 2003) and regulate timing of  
43 spikes in the neurons they couple (Haas, 2015; Pham & Haas, 2018, 2019). Despite their  
44 prevalence and function between spiking neurons across the brain, the effects of neuronal  
45 activity on connection strength remain sparsely characterized. A line of work in non-mammalian  
46 nervous systems has demonstrated the possibility for central electrical synapses to undergo

47 plasticity (McMahon et al., 1989; Pereda & Faber, 1996; Welzel & Schuster, 2018; Yang et al.,  
48 1990). In the mammalian brain, synaptic input has been shown to modulate mammalian  
49 electrical synapses in the inferior olive (Lefler et al., 2014) in an NMDA-dependent manner  
50 (Mathy et al., 2014; Turecek et al., 2014), and tetanic glutamatergic input to coupled TRN  
51 neurons results in long-term depression (LTD)(Landisman & Connors, 2005). The impact of  
52 spiking in coupled neurons on electrical synapses is much less well understood. We previously  
53 showed that LTD of electrical synapses in TRN also follows bursting activity of coupled neurons  
54 (Haas et al., 2011) in a calcium-dependent manner (Sevetson et al., 2017), but a link between  
55 activity in coupled neurons and strengthening of the synapse has remained elusive.

56 Here we demonstrate, using dual whole-cell patch recordings, that long-term potentiation  
57 (LTP) of electrical synapses in the TRN follows low-frequency spiking in one of the cells. LTP is  
58 specific to single-cell activity, and depends on calcium influx. We show that the increase in  
59 coupling strength is expressed in an asymmetrical manner that depends on the direction of  
60 synapse use. Combined with results of calcium imaging during activity, our work leads us to  
61 propose a calcium-based activity dependent plasticity rule for electrical synapses.

## 62 **Results**

63 Thalamic neurons fire action potentials (APs) in two modes: from hyperpolarized resting  
64 potentials, bursts of calcium spikes crowned by a quick sequence of sodium spikes; and from  
65 depolarized rests, regular (tonic) sodium spikes (Fig. 1A). Having previously established that  
66 bursting in coupled TRN neurons leads to long-term depression of the electrical synapse  
67 between them (Haas et al., 2011) as a result of large-conductance, T-channel mediated calcium  
68 influx during bursts (Sevetson et al., 2017), we reasoned that tonic spikes and smaller calcium  
69 influx might lead to potentiation of electrical synapse strength. In order to minimize activation of  
70 the low voltage-activated T-type calcium current that underlies bursts, we added the specific  
71 antagonist TTA-A2 (Kraus et al., 2010) (1  $\mu$ M) to the ACSF bath solution. We applied steady

72 current to raise the membrane potential of one cell of a coupled pair at or above -55 mV, again  
73 to minimize the T current, while maintaining its coupled neighbor at -70 mV. We measured  
74 electrical coupling in each direction separately (Fig. 1B). We then applied small-amplitude, long  
75 pulses of current to the depolarized cell to induce non-continuous tonic spiking for 5 minutes,  
76 resulting in a spiking frequency of 5 - 10 Hz (Fig. 1C). After 5 minutes of tonic spiking activity in  
77 one neuron, coupling conductance measured from the quiet cell into the active cell increased on  
78 average by  $15.5\% \pm 2.3\%$  ( $p_t = 0.004$ ) and coupling coefficient in the same direction increased  
79 by  $13.6 \pm 2.2\%$  (Fig. 1E–F;  $p_t = 0.01$ ,  $n = 12$  pairs). Coupling measured by current injection into  
80 the active cell, in contrast, did not change in conductance ( $-1.5 \pm 0.5\%$ ,  $p_t = 0.78$ ) while  
81 coefficients in this direction decreased by  $7.6 \pm 0.5\%$  ( $p_t = 0.018$ ). Input resistance in the quiet  
82 cell decreased by  $5.5 \pm 0.4\%$  (Fig. 1G;  $p_t = 0.0005$ ), while input resistance in the active cell was  
83 unchanged ( $p_t = 0.73$ ; sign tests performed on changes in  $cc$  and  $G_c$  gave similar results). Input  
84 resistance and coupling coefficients are directly related; thus it is difficult to determine whether  
85 the decrease in  $R_{in}$  caused the apparent decrease in  $cc$  or *vice versa*, but this dependence is  
86 minimized by the calculation of  $G_c$ , which demonstrated clear changes in only one direction in  
87 this experiment. LTP was sustained for more than 25 minutes after induction.

88 LTP was specific to single-cell stimulation: paired activity in TTA did not significantly  
89 change synapse strength (Fig. 2A;  $p_t > 0.05$  for both changes in  $cc$  and  $G_c$ , averaged over both  
90 directions for paired activity,  $n = 8$  pairs), and paired tonic spiking in unmodified ACSF also  
91 failed to change synapse strength (Fig. 2B;  $p_t > 0.05$  for both changes in  $cc$  and  $G_c$ ,  $n = 6$  pairs).

92 We hypothesized that the LTP we observed might be dependent on the smaller amounts  
93 of calcium influx from high-voltage activated channels (Budde et al., 1998). When we repeated  
94 single-cell tonic spiking in TTA with BAPTA in the pipettes to rapidly chelate all influxed calcium  
95 within both neurons, we observed no LTP (Fig. 2C;  $p_t > 0.05$  for both directions of changes in  $cc$   
96 or  $G_c$ ,  $n = 7$  pairs). Single-cell spiking in unmodified ACSF also failed to induce changes in

97 synaptic strength (Fig. 2D;  $p_t > 0.05$  for both directions of changes in  $cc$  or  $G_c$ ,  $n = 9$  pairs).  
98 Together, these results outline a calcium dependence of plasticity: minimal influx of calcium  
99 during single-cell tonic spiking, possibly buffered by the quiet cell, leads to LTP, while larger  
100 influx of calcium during paired tonic spiking activity exceeds that required for LTP, instead  
101 activating the mechanisms leading to LTD (Sevetson et al., 2017).

102 Our hypothesis that the LTP we saw arose from the minimal amount of calcium influx  
103 revealed by TTA and depolarization of the active cell led us to further investigate differences in  
104 calcium influx and transmission across the gap junction during the two different modes of  
105 induced activity. We therefore performed imaging experiments of pairs with the calcium indicator  
106 OGB-1 included in the internal solution (Fig. 3A<sub>1</sub>). We drove one cell to spike either in bursts or  
107 in tonic mode, while we held the quiet cell in held in voltage-clamp mode at -70 mV to minimize  
108 calcium signals arising from voltage-activated channels. During the induced bursting in one cell  
109 that leads to LTD (Haas et al., 2011), both peak and integrated calcium levels were higher in the  
110 active cell and in the quiet coupled neighbor than during induced tonic spiking (Fig. 3A<sub>2</sub>-A<sub>4</sub>). As  
111 a negative control, we repeated the imaging in a non-coupled pair (Fig. 3B<sub>1-4</sub>). Quantification of  
112 peak and integrated calcium signals in the quiet, coupled cells (Fig. 3C, D) both indicate that  
113 less calcium flows across the gap junction during tonic spiking than during bursting (for AUC, -  
114  $25.2 \pm 10.6\%$ ,  $p_s = 0.06$ ; for peak calcium,  $-56.6 \pm 10.9\%$ ,  $p_s = 0.03$ ,  $n = 6$  pairs).

115 The LTP we observed that resulted from single-cell activity was expressed  
116 asymmetrically: coupling into the active cell increased, while coupling into the quiet cell  
117 decreased (Fig. 1). To examine whether this asymmetrical plasticity was consistent across  
118 pairs, we computed asymmetry as the ratio of coupling measured into the active cell, divided by  
119 coupling measured from the active cell. Those ratios consistently increased after LTP induction  
120 for both coupling coefficient (Fig. 4A; mean increase  $24.3 \pm 6.2\%$ ,  $p_t = 0.0015$ ,  $p_s = 0.008$ ,  $n =$   
121 12 pairs) and conductance (Fig. 4B: mean increase  $22.4 \pm 8.2\%$ ,  $p_t = 0.029$ ,  $p_s = 0.008$ ). We

122 noted that some pairs went from initially symmetrical, to finally asymmetric, and *vice versa*.  
123 Changes in coupling asymmetry were uncorrelated with changes in  $R_{in}$  ratios ( $R^2 = 0.39$  for cc  
124 and 0.03 for  $G_C$ ). These results are consistent with the asymmetrical changes we also observed  
125 for burst-induced LTD (Haas et al., 2011) in that both asymmetrical LTP and LTD required  
126 sodium spikes, and changes were larger for coupling measured into the active cell. These  
127 changes in asymmetry indicate that the unidirectional use of the electrical synapse, and perhaps  
128 unidirectional calcium flow, systematically alter the fundamental property of each synapse.

129 Together, our results lead us to propose a calcium rule for plasticity of electrical  
130 synapses, whereby smaller amounts of calcium influx lead to LTP, and larger amounts lead to  
131 LTD (Fig. 5). The proposed rule is similar in concept to those proposed (Bienenstock et al.,  
132 1982; J. Lisman, 1989) (J. E. Lisman, 2001) and demonstrated (Dudek & Bear, 1992; Malenka &  
133 Bear, 2004; Malenka et al., 1989) at glutamatergic synapses.

## 134 **Discussion**

135 Here we show that long-term potentiation of electrical synapses results from tonic  
136 spiking in a single cell of the electrically coupled pair. To our knowledge, this is the first  
137 demonstration of LTP in mammalian electrical synapses that results from spiking activity within  
138 coupled neurons and flow of ions across the synapse. Moreover, our results taken together  
139 indicate a bidirectional calcium dependence of activity-dependent plasticity at electrical  
140 synapses, whereby high calcium influx and flow across the gap junction leads to LTD (Haas et  
141 al., 2011; Sevetson et al., 2017) while minimal calcium influx and flow across the gap junction  
142 leads to LTP. The links established here between physiological patterns of spiking activity in  
143 TRN neurons demonstrate that ongoing plasticity of electrical synapses is likely to occur in the  
144 active brain. As calcium rules are common for chemical synapses, we expect that calcium  
145 dependent rules, possibly in different forms, will underlie plasticity of electrical synapses across  
146 the brain.

147           The magnitude of LTP-induced changes in electrical synapse strength are similar in  
148 magnitude to our previous demonstration of LTD, less than 20% (GC or cc). These are modest  
149 changes relative to those often demonstrated at chemical synapses driven by tetanic  
150 stimulation. A direct comparison between synapse types and plasticity would need to account  
151 for differences in subcellular localization differences and differences in function, for instance  
152 spike efficacy. However, for LTD we showed that these changes were sufficient to silence a  
153 synapse, from one that induces spikes in neighbors, to an ineffective synapse (Haas et al.,  
154 2011). Further, these numerically modest changes in synaptic strength yield 5-10 ms changes in  
155 spike times in coupled neighbors (Haas, 2015). Computational models reinforce the  
156 effectiveness of changes in coupling in this range (Pham & Haas, 2018, 2019). Thus, even  
157 seemingly modest changes in electrical synapse strength produce physiologically substantial  
158 effects, and are poised to exert major influence on TRN synchrony and processing.

159           Our experiments required minimization of T currents by TTA in order to reveal conditions  
160 favorable for LTP at electrical synapses. While this is not strictly a physiological condition, we  
161 expect that together with depolarization of the active cell, these perturbations were necessary to  
162 counterbalance the artificial quiescence and hyperpolarization of the brain slice preparation, in  
163 which almost any depolarization of thalamic neurons activates T currents and thereby LTD. We  
164 expect that LTP is more likely to occur in vivo during prolonged depolarizations when tonic  
165 spiking dominates spiking patterns (Pinault, 2004). We further hypothesize that during tonic  
166 spiking in one neuron, calcium influx into the active cell is buffered across the gap junction by  
167 the quiet cell (Fig. 2, 3). Together, these results imply that LTP can be initiated by tonic spikes in  
168 single neurons, and subsequently counterbalanced by LTD resulting from bursts; together,  
169 these form a bidirectional basis for active neurons to modify the gain of their inputs.

170           Although functional asymmetry is not an expected property of gap junctions purely  
171 composed of connexin36 hemichannels (Srinivas et al., 1999), it has been observed as a



172 widespread property of mammalian electrical synapses (Apostolides & Trussell, 2014; Devor &  
173 Yarom, 2002; Otsuka & Kawaguchi, 2013; Sevetson & Haas, 2015; Snipas et al., 2017;  
174 Vervaeke et al., 2010; Zolnik & Connors, 2016). Our previous results demonstrated that  
175 asymmetry systematically increases during LTD induced by asymmetrical bursting activity  
176 (Haas et al., 2011). Asymmetry was also shown to increase following LTP produced by NMDA  
177 application (Turecek et al., 2014) or by cerebellar input to coupled inferior olivary neurons  
178 (Lefler et al., 2014). Our results here add further evidence towards modifications of asymmetry  
179 that occur during plasticity; both our previous LTD results and the present LTP results indicate  
180 that sodium spikes are necessary for changes in asymmetry, and that changes are larger in the  
181 direction incoming to the active neuron. Together, these reports form a growing consensus that  
182 asymmetry and asymmetrical changes are a fundamental property of electrical synapses that  
183 potentially refine the function of each individual synapse within its neuronal circuit, allowing for  
184 each neuron to adjust the relative proportion of input it sends and/or receive from coupled  
185 neighbors via electrical synapses. Differences in intracellular scaffolding proteins have been  
186 shown to construct asymmetrical electrical synapses in zebrafish (Marsh et al., 2017). We  
187 suggest that increased expression or open probability of more-asymmetrical non-connexin36  
188 proteins (Zolnik & Connors, 2016) could also account for this activity-dependent increase in  
189 asymmetry. Alternatively, differential post-translational modification, such as asymmetrical  
190 phosphorylation of cx36 hemichannels, or differences in ubiquitination-mediated endocytosis  
191 (Lynn et al., 2018), or the hypothesized effects of gating properties of the channel (Snipas et al.,  
192 2017) remain possible. In TRN, calcium bursts are activated in dendrites independently of  
193 somatic compartments, which could further result in independent modifications of one side of  
194 the gap junction. Asymmetry can strongly influence spike times in coupled pairs (Sevetson &  
195 Haas, 2015) and thereby impact cortical discrimination through the thalamocortical circuit (Pham  
196 & Haas, 2018). We suggest that it may also take part in directional signaling mediated by

197 electrical synapses, such as that found in direction-sensitive retinal ganglion cells (Yao et al.,  
198 2018).

199         Based on our previous and current work, we propose a calcium rule for bidirectional  
200 activity-dependent plasticity at electrical synapses. This rule is 'inverse' to those described for  
201 chemical synapses, where smaller calcium influx produces LTD while larger influxes lead to LTP  
202 (Bienenstock et al., 1982; Dudek & Bear, 1992; Malenka et al., 1989). Notably, an inverse rule  
203 for chemical synapses also exists in the cerebellum (Coessmans et al., 2004). As previous  
204 studies have found that LTD is induced by calcium-based pathways leading to phosphatase  
205 activation (Sevetson et al., 2017), we expect that LTP may depend on a phosphorylation  
206 mechanism initiated by calcium. Retinal coupling depends on phosphorylation (Kothmann et al.,  
207 2007), and tetanus-induced forms of plasticity at mixed synapses onto Mauthner cells in goldfish  
208 depend on NMDA-regulated calcium entry (Pereda & Faber, 1996; Yang et al., 1990). Recent  
209 work has also shown that spiking-initiated calcium entry leads to potentiation for up to 10 min. at  
210 an invertebrate electrical synapse (Welzel & Schuster, 2018). While not directly examined, our  
211 results imply that the threshold between the concentration of calcium for LTP and LTD is rather  
212 low, as even paired tonic spiking fails to induce LTP, and the T current that underlies burst-  
213 induced LTD is active at rest potentials. This bias of plasticity towards LTD, however, could be  
214 specific to brain-slice conditions, as addressed above. We find it likely that electrical synapses  
215 across the brain follow a calcium-based rule for plasticity, although non-bursting neuronal types  
216 may alternatively follow a different rule.

217         A role for plasticity of electrical synapses has been proposed for switches in attentional  
218 state (Coulon & Landisman, 2017). Taken together, our results demonstrate that the strength of  
219 electrical synapses can be modified positively or negatively in strength as a result of  
220 physiological activity in the TRN, and with neuron-specific directionality. For single cells, activity-  
221 dependent plasticity of electrical synapses could modulate that cell's input sensitivity between

222 modes in which intra-TRN input is strongest and dominates its responses, to modes in which  
223 corticothalamic or thalamocortical chemical input is given preference over electrically networked  
224 signals. This high degree of acuity and adjustability of connectivity within coupled networks  
225 forms a basis for shifts of sensory attention regulated by the TRN. TRN neurons can toggle  
226 thalamic neurons between firing modes in order to maintain cortical sleep rhythms and the  
227 associated behaviors of that state (Sorokin et al., 2017), and the activity and synchrony of TRN  
228 neurons required for that toggle may be supplied by its electrical synapses. Sensory processing  
229 of selective features (Soto-Sanchez et al., 2017) is also likely to depend on acutely refined TRN  
230 connectivity in a similar manner. Beyond the TRN and its functions, our work shows that  
231 electrically coupled networks are potentially under a high degree of regulation of function  
232 throughout the mammalian brain.

233

234

## 235 **Methods**

### 236 *Electrophysiology*

237 All experiments were performed in accordance with federal and Lehigh University IACUC animal  
238 welfare guidelines. Sprague-Dawley rats of both sexes aged postnatal day 11-15 were  
239 anesthetized by inhaled isoflurane (5 mL of isoflurane applied to fabric, within a 1 L chamber)  
240 and sacrificed via decapitation. Horizontal brain slices 300-400  $\mu\text{m}$  thick were cut and incubated  
241 in sucrose solution (in mM): 72 sucrose, 83 NaCl, 2.5KCl, 1 NaPO<sub>4</sub>, 3.3 MgSO<sub>4</sub>, 26.2 NaHCO<sub>3</sub>,  
242 22 dextrose, 0.5 CaCl<sub>2</sub>. Slices were incubated at 37°C for 20 min following cutting and returned  
243 to room temperature until recording. The bath for solution during recording contained (in mM):  
244 126 NaCl, 3 KCl, 1.25 NaH<sub>2</sub>PO<sub>4</sub>, 2 MgSO<sub>4</sub>, 26 NaHCO<sub>3</sub>, 10 dextrose and 2 CaCl<sub>2</sub>, 300–305  
245 mOsm L<sup>-1</sup>, saturated with 95% O<sub>2</sub>/5% CO<sub>2</sub>. The submersion recording chamber was held at

246 34°C (TC-324B, Warner Instruments). Micropipettes were filled with (in mM): 135 potassium  
247 gluconate, 2 KCl, 4 NaCl, 10 Hepes, 0.2 EGTA, 4 ATP-Mg, 0.3 GTP-Tris, and 10  
248 phosphocreatine-Tris (pH 7.25, 295 mOsm L<sup>-1</sup>). 1 M KOH was used to adjust pH of the internal  
249 solution. Internal containing 1,2-bis(2-aminophenoxy)ethane-N,N,N', N'-tetraacetic acid  
250 (BAPTA) had concentrations of 10 μM. The approximate bath flowrate was 2 ml min<sup>-1</sup> and the  
251 recording chamber held approximately 5 ml solution. The specific T-channel antagonist TTA-A2,  
252 generously provided by Dr Bruce Bean (Harvard University) or TTA-P2 (Alamone) were made  
253 into stock aliquots of 3 mM in DMSO; final concentration was 1 μM. 6-Cyano-7-nitroquinoxaline-  
254 2,3-dione (CNQX) at 2.5 μM was obtained from Sigma (St. Louis, MO, USA), and diluted into  
255 high-concentration stock solutions in DMSO or water before final dilution. Final DMSO  
256 concentration was always <0.2%.

257

258 The TRN was visualized under 5x magnification, and pairs of TRN cells were identified and  
259 patched under 40x IR-DIC optics (SliceScope, Scientifica, Uckfield, UK). Voltage signals were  
260 amplified and low-pass filtered at 8 kHz (MultiClamp, Axon Instruments, Molecular Devices,  
261 Sunnyvale, CA, USA), digitized at 20 kHz (custom Matlab routines controlling a National  
262 Instruments (Austin, TX, USA) USB6221 DAQ board), and data were stored for offline analysis  
263 in Matlab (Mathworks, R2017a, Natick, MA, USA). Recordings were made in whole-cell current-  
264 clamp mode. Values  $V_{rest}$  ranged from -50 to -70 mV. 500-ms pulses of negative injections of  
265 current were used to measure coupling, with amplitudes of injected current minimized in order to  
266 minimize T current activation in the injected cell, with a goal of 0.5 - 1 mV deflection in the  
267 coupled cell. Pipette resistances were 5-9 MΩ before bridge balance, which was removed if  
268 exceeding 25 MΩ. Voltages are reported uncorrected for the liquid junction potential.

269 *Calcium imaging*

270 To visualize calcium flux into and within coupled and uncoupled cells, 200  $\mu$ M Oregon Green  
271 488 BAPTA-1 (OGB-1) was added to the internal solution. An LED with wavelength 472 nm was  
272 delivered through the objective to excite the OGB-1. Images were captured at 30 fps through  
273 40X IR-DIC optics (SliceScope, Scientifica, Uckfield, UK) and stored for offline analysis with  
274 Matlab. Regions of interest (ROIs) were chosen in the center of each recorded neuron, and  
275 changes in fluorescence normalized to baseline and background fluorescence were computed  
276 for each ROI.

### 277 *Numerical Analysis*

278 All numerical analysis was performed in Matlab (R2017). Input resistances ( $R_{in}$ ) for each cell  
279 and coupling between cells were quantified by injecting 25-100 pA of hyperpolarizing current  
280 into one cell of a coupled pair and measuring the voltage deflection in that cell ( $\Delta V$ ) and in the  
281 couple neighbor ( $\delta V$ ). Coupling coefficient ( $cc$ ) is computed as  $\delta V/\Delta V$  and are reported as  
282 averages of a set of 10 measurements, repeated every 2 min. Coupling conductances  $G_c$  were  
283 estimated separately for each direction (Fortier, 2010; Severson & Haas, 2015). Experiments  
284 were discarded if input resistance  $R_{in}$  of either cell deviated from its initial value by more than  
285 20%. Changes in coupling were evaluated as the average over the first 20 minutes following  
286 activity, compared to the normalized baseline values, and are reported as means  $\pm$  SEM. We  
287 report Student's  $t$ -tests as two-tailed paired comparisons of pre- and post-stimulus averages  
288 and report the results as  $p_t$ . Two-sided Wilcoxon signed rank tests were also carried out on the  
289 sets of change in coupling for each condition and are reported as  $p_s$ . No multiple comparisons  
290 were performed.

291

292

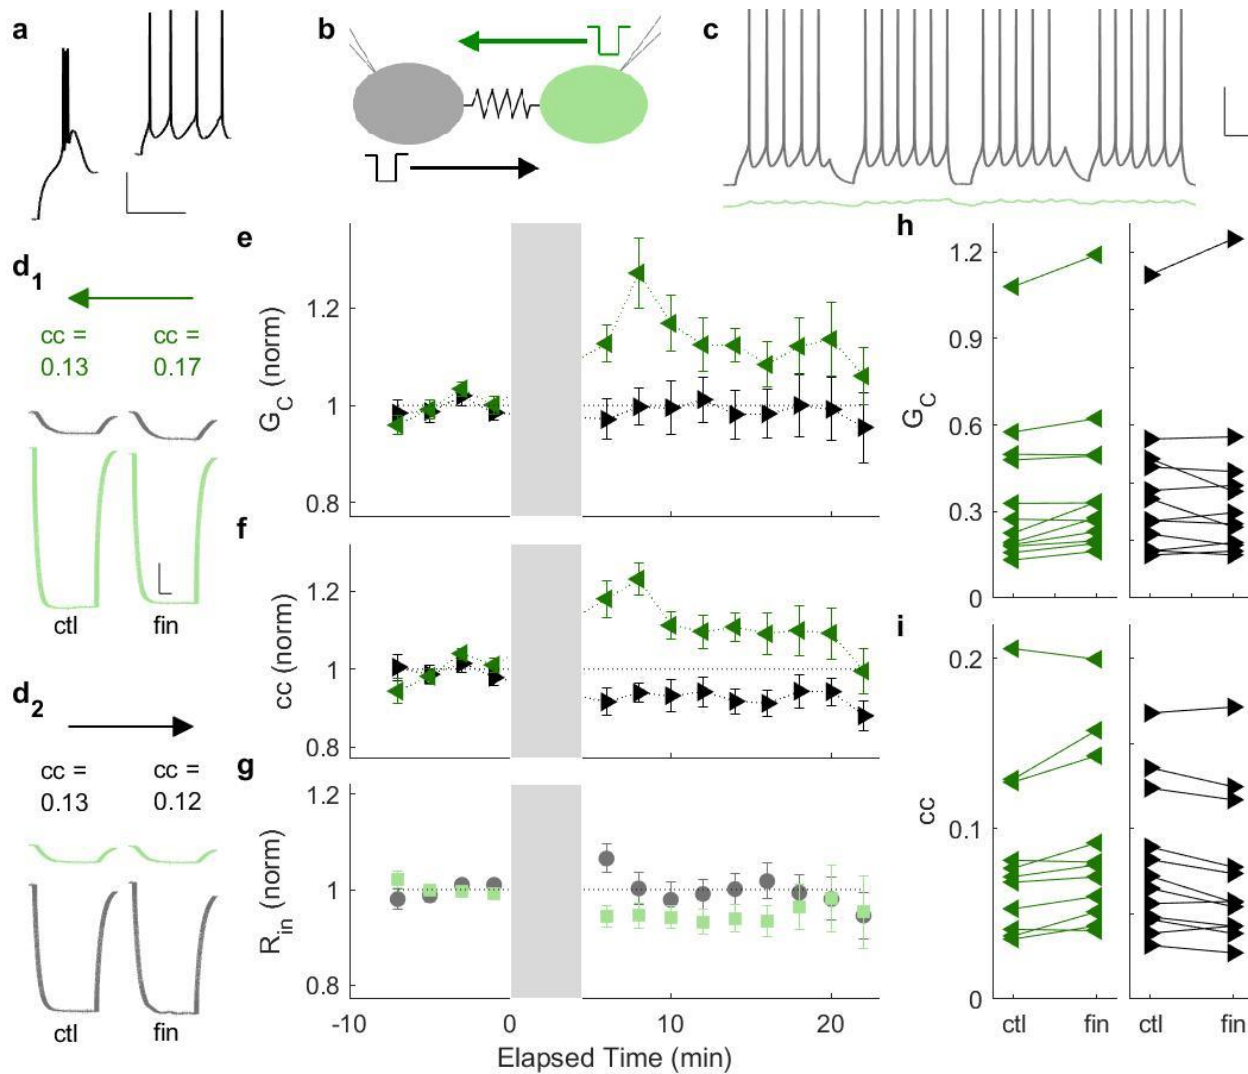

293

294 **Figure 1. Long-term potentiation results from tonic firing in one cell of a coupled pair.** A)  
295 TRN neurons fire bursts from hyperpolarized potentials (left;  $V_m = -82$  mV) and tonic spikes from  
296 depolarized potentials (right;  $V_m = -55$  mV). Scale bar 20 mV, 200 ms. B) Schematic of coupling  
297 measurement from an active cell (grey) and its electrically coupled neighbor (sage). C) Regular  
298 tonic spiking was driven by current injection into one cell (grey;  $V_m = -54$  mV), while the coupled  
299 cell (sage) rests at  $-70$  mV without stimulation. Experiments were performed with TTA in the  
300 bath. Scale bar 25 mV, 250 ms. D) Coupling coefficients (cc) for a pair before (left) and after  
301 (right) tonic spiking as shown in C. **cc** from the quiet cell into the active cell (green arrows) is

302 shown in the top panel, and **cc** in the reverse direction on bottom. E) Coupling conductance  $G_C$   
303 shown for each direction, before and after stimulated spiking, normalized to pre-activity values  
304 (for  $G_C$  quiet  $\rightarrow$  active,  $\Delta G_C = 15.5 \pm 2.4\%$ ,  $p_t = 0.004$ ; for  $G_C$  active  $\rightarrow$  quiet,  $\Delta G_C = -1.5 \pm 0.5\%$ ,  
305  $p_t = 0.78$ ;  $n = 12$  pairs). F) **cc** for each direction (for quiet  $\rightarrow$  active,  $\Delta cc = 13.6 \pm 2.2\%$ ,  $p_t = 0.01$ ,  
306  $n = 12$ ; for active  $\rightarrow$  quiet,  $\Delta cc = 7.6 \pm 0.5\%$ ,  $p_t = 0.018$ ;  $n = 12$  pairs). G) Input resistance for  
307 both cells during the experiments. H)  $G_C$  for each pair used in D (for  $G_C$  quiet  $\rightarrow$  active,  $p_s =$   
308  $0.0009$ ; for active  $\rightarrow$  quiet,  $p_s = 0.76$ ). I) **cc** for each pair used in E (for **cc** quiet  $\rightarrow$  active,  $p_s =$   
309  $0.01$ ; for active  $\rightarrow$  quiet,  $p_s = 0.019$ ).  $p_t$  indicates 2-tailed, paired Student's t-test, and  $p_s$  is a  
310 Wilcoxon sign test.

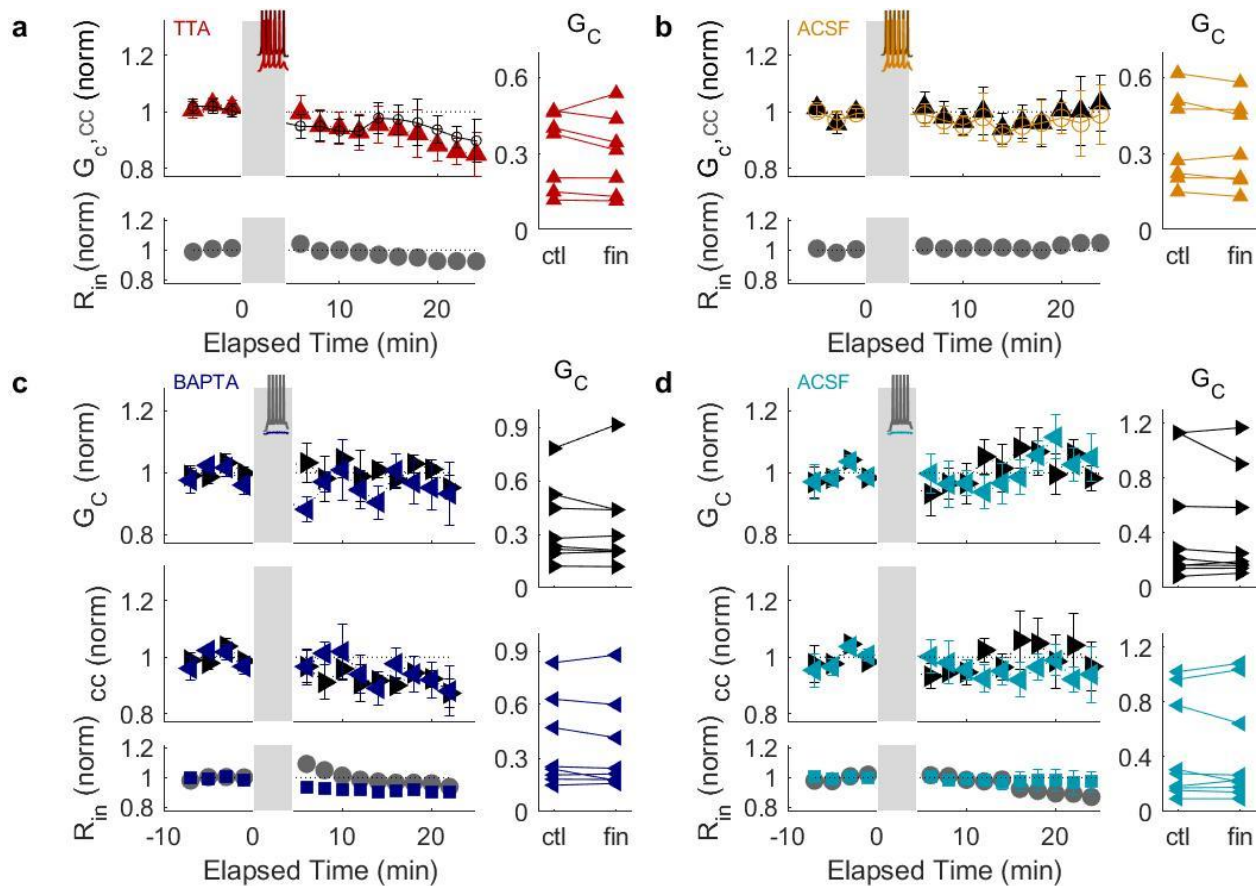

311

312 **Figure 2. LTP is specific to single-cell stimulation and depends on calcium influx.** A) cc  
 313 and  $G_C$  before and after paired tonic spiking in TTA (averaged over both directions; for  $\Delta cc$ ,  $p_t =$   
 314  $0.13$ ,  $p_s = 0.12$ ; for  $\Delta G_C$ ,  $p_t = 0.3$ ,  $p_s = 0.2$ ;  $n = 8$  pairs). B) cc and  $G_C$  before and after paired  
 315 tonic spiking in unmodified ACSF (averaged over both directions; for  $\Delta cc$ ,  $p_t = 0.37$ ,  $p_s = 0.46$ ;  
 316 for  $\Delta G_C$ ,  $p_t = 0.08$ ,  $p_s = 0.07$ ;  $n = 6$  pairs). C) cc and  $G_C$  before and after single-cell spiking with  
 317 calcium chelated by BAPTA in the internal. For  $\Delta G_C$  active  $\rightarrow$  quiet,  $p_t = 0.89$ ,  $p_s = 0.84$ ; for  $\Delta G_C$   
 318 quiet  $\rightarrow$  active,  $p_t = 0.34$ ,  $p_s = 0.46$ ; for  $\Delta cc$  active  $\rightarrow$  quiet,  $p_t = 0.09$ ,  $p_s = 0.07$ ; for  $\Delta cc$  quiet  $\rightarrow$   
 319 active,  $p_t = 0.66$ ,  $p_s = 0.95$  ( $n = 7$  pairs). D) cc and  $G_C$  before and after single-cell tonic spiking in  
 320 unmodified ACSF. For  $\Delta G_C$  active  $\rightarrow$  quiet,  $p_t = 0.38$ ,  $p_s = 0.57$ ; for  $\Delta G_C$  quiet  $\rightarrow$  active,  $p_t =$   
 321  $0.78$ ,  $p_s = 0.82$ ; for  $\Delta cc$  active  $\rightarrow$  quiet,  $p_t = 0.4$ ,  $p_s = 0.73$ ; for  $\Delta cc$  quiet  $\rightarrow$  active,  $p_t = 0.16$ ,  $p_s =$   
 322  $0.25$  ( $n = 9$  pairs).



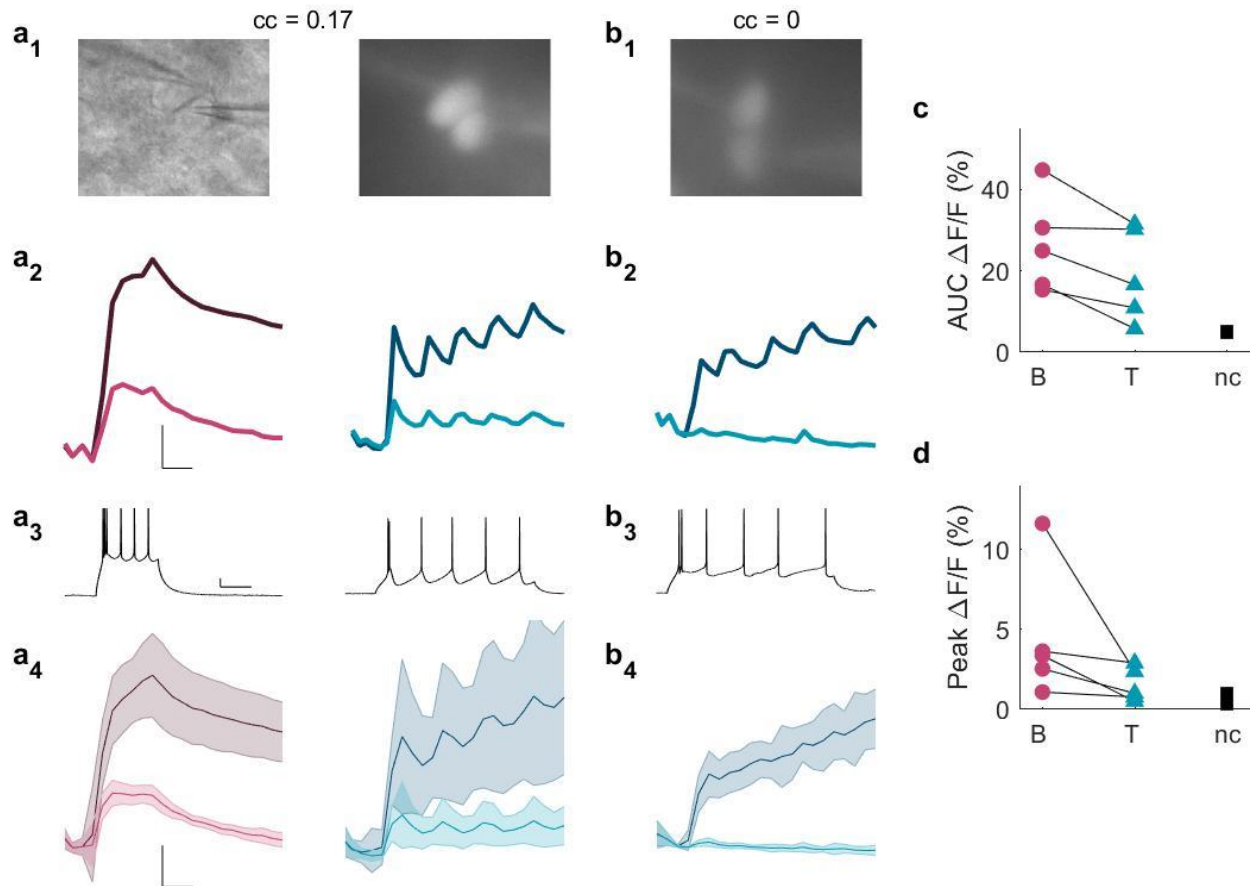

323

324 **Figure 3. Calcium flows across the gap junction during spiking.** A<sub>1</sub>) IR-DIC and GFP  
 325 images of a coupled pair (cc = 0.17). A<sub>2</sub>) Calcium signals ( $\Delta F/F$ ) in a cell directly stimulated to  
 326 burst (dark red) or spike tonically (dark blue), and calcium signals in the quiet cell (lighter  
 327 shades) of a coupled pair. Scale bar 2.5%, 100 ms. A<sub>3</sub>) Bursting (left) or tonic spikes (center)  
 328 that drove responses in A<sub>2</sub>. Scale bar 10 mV, 100 ms. A<sub>4</sub>) Average calcium signals during  
 329 bursting (reds) and tonic spiking (blues) in this coupled pair. B<sub>1</sub>) GFP image of an uncoupled  
 330 pair. Scale bar 2.5%, 100 ms. B<sub>2</sub>) Calcium signals ( $\Delta F/F$ ) in a cell directly stimulated spike  
 331 tonically (dark blue), and in the quiet uncoupled cell (light blue). B<sub>3</sub>) Tonic spikes that drove  
 332 responses in B<sub>2</sub>. B<sub>4</sub>) Average calcium signals during tonic spiking in uncoupled pairs (n = 2  
 333 pairs). C) Total (area under curve)  $\Delta F/F$  in the quiet cell during bursting (B, red) and tonic spikes  
 334 (T, blue) within each pair (mean difference  $-25.2 \pm 10.6\%$ ,  $p_s = 0.06$ , n = 6 pairs), and for

335 uncoupled pairs (black, nc; n = 2 pairs). D) Peak  $\Delta F/F$  in the quiet cell during bursting (B, red)  
336 and tonic spikes (T, blue) within each pair (mean difference  $-56.6 \pm 10.9\%$ ,  $p_s = 0.03$ , n = 6  
337 pairs), and for uncoupled pairs (black, nc; n = 2 pairs).

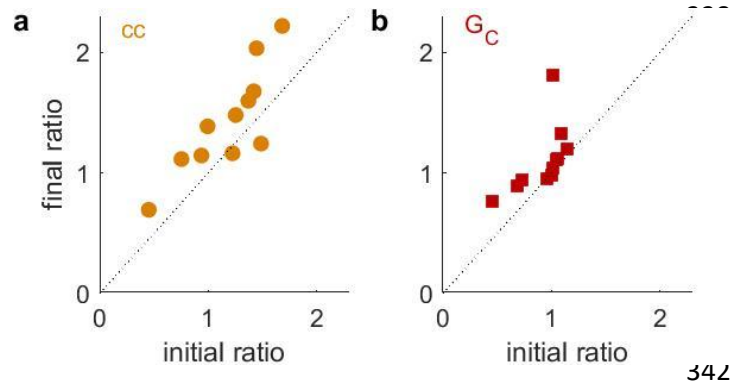

343 **Figure 4. LTP is expressed asymmetrically.** A) Asymmetry of coupling (**cc** into active cell / **cc**  
344 from active cell) increased consistently across pairs following activity-induced LTP, plotted here  
345 against initial values (mean change  $24.3 \pm 6.2\%$ ,  $p_t = 0.0015$ ,  $p_s = 0.008$ ,  $n = 12$  pairs). B)  
346 Asymmetry of coupling conductance ( $G_C$  into active cell /  $G_C$  from active cell) increased  
347 consistently across pairs following activity-induced LTP, plotted against initial values (mean  
348 change  $22.4 \pm 8.2\%$ ,  $p_t = 0.029$ ,  $p_s = 0.008$ ).

349

350

351

352

353

354

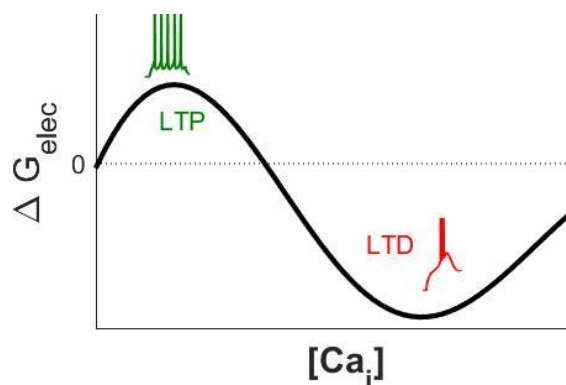

359 **Figure 5. Proposed calcium-based activity rule for electrical synapses.** Smaller influx of  
360 calcium during tonic spiking (green) leads to LTP, while larger influx during bursting (red) leads  
361 to LTD.

## 362 References

363

- 364 Apostolides, P. F., & Trussell, L. O. (2014). Control of Interneuron Firing by Subthreshold Synaptic  
365 Potentials in Principal Cells of the Dorsal Cochlear Nucleus. *Neuron*. Retrieved from  
366 [http://www.ncbi.nlm.nih.gov/entrez/query.fcgi?cmd=Retrieve&db=PubMed&dopt=Citation&list](http://www.ncbi.nlm.nih.gov/entrez/query.fcgi?cmd=Retrieve&db=PubMed&dopt=Citation&listuids=25002229)  
367 [uids=25002229](http://www.ncbi.nlm.nih.gov/entrez/query.fcgi?cmd=Retrieve&db=PubMed&dopt=Citation&listuids=25002229)
- 368 Bennett, M. V., & Zukin, R. S. (2004). Electrical coupling and neuronal synchronization in the Mammalian  
369 brain. *Neuron*, 41(4), 495-511. Retrieved from  
370 [http://www.ncbi.nlm.nih.gov/entrez/query.fcgi?cmd=Retrieve&db=PubMed&dopt=Citation&list](http://www.ncbi.nlm.nih.gov/entrez/query.fcgi?cmd=Retrieve&db=PubMed&dopt=Citation&listuids=14980200)  
371 [uids=14980200](http://www.ncbi.nlm.nih.gov/entrez/query.fcgi?cmd=Retrieve&db=PubMed&dopt=Citation&listuids=14980200)
- 372 Bienenstock, E. L., Cooper, L. N., & Munro, P. W. (1982). Theory for the development of neuron  
373 selectivity: orientation specificity and binocular interaction in visual cortex. *J Neurosci*, 2(1), 32-  
374 48. Retrieved from  
375 [http://www.ncbi.nlm.nih.gov/entrez/query.fcgi?cmd=Retrieve&db=PubMed&dopt=Citation&list](http://www.ncbi.nlm.nih.gov/entrez/query.fcgi?cmd=Retrieve&db=PubMed&dopt=Citation&listuids=7054394)  
376 [uids=7054394](http://www.ncbi.nlm.nih.gov/entrez/query.fcgi?cmd=Retrieve&db=PubMed&dopt=Citation&listuids=7054394)
- 377 Budde, T., Munsch, T., & Pape, H. C. (1998). Distribution of L-type calcium channels in rat thalamic  
378 neurones. *Eur J Neurosci*, 10(2), 586-597. Retrieved from  
379 <http://www.ncbi.nlm.nih.gov/pubmed/9749721>
- 380 Chow, C. C., & Kopell, N. (2000). Dynamics of spiking neurons with electrical coupling. *Neural Comput*,  
381 12(7), 1643-1678. Retrieved from  
382 [http://www.ncbi.nlm.nih.gov/entrez/query.fcgi?cmd=Retrieve&db=PubMed&dopt=Citation&list](http://www.ncbi.nlm.nih.gov/entrez/query.fcgi?cmd=Retrieve&db=PubMed&dopt=Citation&listuids=10935921)  
383 [uids=10935921](http://www.ncbi.nlm.nih.gov/entrez/query.fcgi?cmd=Retrieve&db=PubMed&dopt=Citation&listuids=10935921)
- 384 Coesmans, M., Weber, J. T., De Zeeuw, C. I., & Hansel, C. (2004). Bidirectional parallel fiber plasticity in  
385 the cerebellum under climbing fiber control. *Neuron*, 44(4), 691-700.  
386 doi:10.1016/j.neuron.2004.10.031
- 387 Connors, B. W., & Long, M. A. (2004). Electrical synapses in the mammalian brain. *Annu Rev Neurosci*,  
388 27, 393-418. Retrieved from  
389 [http://www.ncbi.nlm.nih.gov/entrez/query.fcgi?cmd=Retrieve&db=PubMed&dopt=Citation&list](http://www.ncbi.nlm.nih.gov/entrez/query.fcgi?cmd=Retrieve&db=PubMed&dopt=Citation&listuids=15217338)  
390 [uids=15217338](http://www.ncbi.nlm.nih.gov/entrez/query.fcgi?cmd=Retrieve&db=PubMed&dopt=Citation&listuids=15217338)
- 391 Contreras, D., Curro Dossi, R., & Steriade, M. (1992). Bursting and tonic discharges in two classes of  
392 reticular thalamic neurons. *J Neurophysiol*, 68(3), 973-977. Retrieved from  
393 [http://www.ncbi.nlm.nih.gov/entrez/query.fcgi?cmd=Retrieve&db=PubMed&dopt=Citation&list](http://www.ncbi.nlm.nih.gov/entrez/query.fcgi?cmd=Retrieve&db=PubMed&dopt=Citation&listuids=1432063)  
394 [uids=1432063](http://www.ncbi.nlm.nih.gov/entrez/query.fcgi?cmd=Retrieve&db=PubMed&dopt=Citation&listuids=1432063)
- 395 Coulon, P., & Landisman, C. E. (2017). The Potential Role of Gap Junctional Plasticity in the Regulation of  
396 State. *Neuron*, 93(6), 1275-1295. doi:10.1016/j.neuron.2017.02.041
- 397 Crunelli, V., Cope, D. W., & Hughes, S. W. (2006). Thalamic T-type Ca<sup>2+</sup> channels and NREM sleep. *Cell*  
398 *Calcium*, 40(2), 175-190. doi:10.1016/j.ceca.2006.04.022
- 399 Destexhe, A. (1998). Spike-and-wave oscillations based on the properties of GABAB receptors. *J*  
400 *Neurosci*, 18(21), 9099-9111. Retrieved from  
401 [http://www.ncbi.nlm.nih.gov/entrez/query.fcgi?cmd=Retrieve&db=PubMed&dopt=Citation&list](http://www.ncbi.nlm.nih.gov/entrez/query.fcgi?cmd=Retrieve&db=PubMed&dopt=Citation&listuids=9787013)  
402 [uids=9787013](http://www.ncbi.nlm.nih.gov/entrez/query.fcgi?cmd=Retrieve&db=PubMed&dopt=Citation&listuids=9787013)
- 403 Destexhe, A., Bal, T., McCormick, D. A., & Sejnowski, T. J. (1996). Ionic mechanisms underlying  
404 synchronized oscillations and propagating waves in a model of ferret thalamic slices. *J*  
405 *Neurophysiol*, 76(3), 2049-2070. Retrieved from  
406 <http://www.ncbi.nlm.nih.gov/pubmed/8890314>

- 407 Devor, A., & Yarom, Y. (2002). Electrotonic coupling in the inferior olivary nucleus revealed by  
408 simultaneous double patch recordings. *J Neurophysiol*, *87*(6), 3048-3058. Retrieved from  
409 [http://www.ncbi.nlm.nih.gov/entrez/query.fcgi?cmd=Retrieve&db=PubMed&dopt=Citation&list](http://www.ncbi.nlm.nih.gov/entrez/query.fcgi?cmd=Retrieve&db=PubMed&dopt=Citation&listuids=12037207)  
410 [uids=12037207](http://www.ncbi.nlm.nih.gov/entrez/query.fcgi?cmd=Retrieve&db=PubMed&dopt=Citation&listuids=12037207)
- 411 Draguhn, A., Traub, R. D., Schmitz, D., & Jefferys, J. G. (1998). Electrical coupling underlies high-  
412 frequency oscillations in the hippocampus in vitro. *Nature*, *394*(6689), 189-192. Retrieved from  
413 [http://www.ncbi.nlm.nih.gov/entrez/query.fcgi?cmd=Retrieve&db=PubMed&dopt=Citation&list](http://www.ncbi.nlm.nih.gov/entrez/query.fcgi?cmd=Retrieve&db=PubMed&dopt=Citation&listuids=9671303)  
414 [uids=9671303](http://www.ncbi.nlm.nih.gov/entrez/query.fcgi?cmd=Retrieve&db=PubMed&dopt=Citation&listuids=9671303)
- 415 Dudek, S. M., & Bear, M. F. (1992). Homosynaptic long-term depression in area CA1 of hippocampus and  
416 effects of N-methyl-D-aspartate receptor blockade. *Proc Natl Acad Sci U S A*, *89*(10), 4363-4367.  
417 Retrieved from  
418 [http://www.ncbi.nlm.nih.gov/entrez/query.fcgi?cmd=Retrieve&db=PubMed&dopt=Citation&list](http://www.ncbi.nlm.nih.gov/entrez/query.fcgi?cmd=Retrieve&db=PubMed&dopt=Citation&listuids=1350090)  
419 [uids=1350090](http://www.ncbi.nlm.nih.gov/entrez/query.fcgi?cmd=Retrieve&db=PubMed&dopt=Citation&listuids=1350090)
- 420 Ferrarelli, F., & Tononi, G. (2011). The thalamic reticular nucleus and schizophrenia. *Schizophr Bull*,  
421 *37*(2), 306-315. Retrieved from  
422 [http://www.ncbi.nlm.nih.gov/entrez/query.fcgi?cmd=Retrieve&db=PubMed&dopt=Citation&list](http://www.ncbi.nlm.nih.gov/entrez/query.fcgi?cmd=Retrieve&db=PubMed&dopt=Citation&listuids=21131368)  
423 [uids=21131368](http://www.ncbi.nlm.nih.gov/entrez/query.fcgi?cmd=Retrieve&db=PubMed&dopt=Citation&listuids=21131368)
- 424 Fortier, P. A. (2010). Detecting and estimating rectification of gap junction conductance based on  
425 simulations of dual-cell recordings from a pair and a network of coupled cells. *J Theor Biol*,  
426 *265*(2), 104-114. Retrieved from  
427 [http://www.ncbi.nlm.nih.gov/entrez/query.fcgi?cmd=Retrieve&db=PubMed&dopt=Citation&list](http://www.ncbi.nlm.nih.gov/entrez/query.fcgi?cmd=Retrieve&db=PubMed&dopt=Citation&listuids=20385146)  
428 [uids=20385146](http://www.ncbi.nlm.nih.gov/entrez/query.fcgi?cmd=Retrieve&db=PubMed&dopt=Citation&listuids=20385146)
- 429 Fuentealba, P., & Steriade, M. (2005). The reticular nucleus revisited: intrinsic and network properties of  
430 a thalamic pacemaker. *Progress in Neurobiology*, *75*(2), 125-141. Retrieved from  
431 [http://www.ncbi.nlm.nih.gov/entrez/query.fcgi?cmd=Retrieve&db=PubMed&dopt=Citation&list](http://www.ncbi.nlm.nih.gov/entrez/query.fcgi?cmd=Retrieve&db=PubMed&dopt=Citation&listuids=15784303)  
432 [uids=15784303](http://www.ncbi.nlm.nih.gov/entrez/query.fcgi?cmd=Retrieve&db=PubMed&dopt=Citation&listuids=15784303)
- 433 Galarreta, M., & Hestrin, S. (2001). Electrical synapses between GABA-releasing interneurons. *Nat Rev*  
434 *Neurosci*, *2*(6), 425-433. Retrieved from  
435 [http://www.ncbi.nlm.nih.gov/entrez/query.fcgi?cmd=Retrieve&db=PubMed&dopt=Citation&list](http://www.ncbi.nlm.nih.gov/entrez/query.fcgi?cmd=Retrieve&db=PubMed&dopt=Citation&listuids=11389476)  
436 [uids=11389476](http://www.ncbi.nlm.nih.gov/entrez/query.fcgi?cmd=Retrieve&db=PubMed&dopt=Citation&listuids=11389476)
- 437 Gutierrez, G. J., O'Leary, T., & Marder, E. (2013). Multiple mechanisms switch an electrically coupled,  
438 synaptically inhibited neuron between competing rhythmic oscillators. *Neuron*, *77*(5), 845-858.  
439 doi:10.1016/j.neuron.2013.01.016
- 440 Haas, J. S. (2015). A new measure for the strength of electrical synapses. *Front Cell Neurosci*, *9*, 378.  
441 Retrieved from  
442 [http://www.ncbi.nlm.nih.gov/entrez/query.fcgi?cmd=Retrieve&db=PubMed&dopt=Citation&list](http://www.ncbi.nlm.nih.gov/entrez/query.fcgi?cmd=Retrieve&db=PubMed&dopt=Citation&listuids=26441546)  
443 [uids=26441546](http://www.ncbi.nlm.nih.gov/entrez/query.fcgi?cmd=Retrieve&db=PubMed&dopt=Citation&listuids=26441546)
- 444 Haas, J. S., & Landisman, C. E. (2012). State-dependent modulation of gap junction signaling by the  
445 persistent sodium current. *Front Cell Neurosci*, *5*, 31. Retrieved from  
446 [http://www.ncbi.nlm.nih.gov/entrez/query.fcgi?cmd=Retrieve&db=PubMed&dopt=Citation&list](http://www.ncbi.nlm.nih.gov/entrez/query.fcgi?cmd=Retrieve&db=PubMed&dopt=Citation&listuids=22319469)  
447 [uids=22319469](http://www.ncbi.nlm.nih.gov/entrez/query.fcgi?cmd=Retrieve&db=PubMed&dopt=Citation&listuids=22319469)
- 448 Haas, J. S., Zavala, B., & Landisman, C. E. (2011). Activity-dependent long-term depression of electrical  
449 synapses. *Science*, *334*(6054), 389-393. Retrieved from  
450 [http://www.ncbi.nlm.nih.gov/entrez/query.fcgi?cmd=Retrieve&db=PubMed&dopt=Citation&list](http://www.ncbi.nlm.nih.gov/entrez/query.fcgi?cmd=Retrieve&db=PubMed&dopt=Citation&listuids=22021860)  
451 [uids=22021860](http://www.ncbi.nlm.nih.gov/entrez/query.fcgi?cmd=Retrieve&db=PubMed&dopt=Citation&listuids=22021860)
- 452 Halassa, M. M., Chen, Z., Wimmer, R. D., Brunetti, P. M., Zhao, S., Zikopoulos, B., . . . Wilson, M. A.  
453 (2014). State-dependent architecture of thalamic reticular subnetworks. *Cell*, *158*(4), 808-821.  
454 Retrieved from

- 455 [http://www.ncbi.nlm.nih.gov/entrez/query.fcgi?cmd=Retrieve&db=PubMed&dopt=Citation&list](http://www.ncbi.nlm.nih.gov/entrez/query.fcgi?cmd=Retrieve&db=PubMed&dopt=Citation&listuids=25126786)  
456 [uids=25126786](http://www.ncbi.nlm.nih.gov/entrez/query.fcgi?cmd=Retrieve&db=PubMed&dopt=Citation&listuids=25126786)
- 457 Hou, G., Smith, A. G., & Zhang, Z. W. (2016). Lack of Intrinsic GABAergic Connections in the Thalamic  
458 Reticular Nucleus of the Mouse. *J Neurosci*, *36*(27), 7246-7252. doi:10.1523/JNEUROSCI.0607-  
459 16.2016
- 460 Huguenard, J. R., & Prince, D. A. (1992). A novel T-type current underlies prolonged Ca(2+)-dependent  
461 burst firing in GABAergic neurons of rat thalamic reticular nucleus. *J Neurosci*, *12*(10), 3804-  
462 3817. Retrieved from  
463 [http://www.ncbi.nlm.nih.gov/entrez/query.fcgi?cmd=Retrieve&db=PubMed&dopt=Citation&list](http://www.ncbi.nlm.nih.gov/entrez/query.fcgi?cmd=Retrieve&db=PubMed&dopt=Citation&listuids=1403085)  
464 [uids=1403085](http://www.ncbi.nlm.nih.gov/entrez/query.fcgi?cmd=Retrieve&db=PubMed&dopt=Citation&listuids=1403085)
- 465 Kimura, A. (2014). Diverse subthreshold cross-modal sensory interactions in the thalamic reticular  
466 nucleus: implications for new pathways of cross-modal attentional gating function. *Eur J*  
467 *Neurosci*, *39*(9), 1405-1418. Retrieved from  
468 [http://www.ncbi.nlm.nih.gov/entrez/query.fcgi?cmd=Retrieve&db=PubMed&dopt=Citation&list](http://www.ncbi.nlm.nih.gov/entrez/query.fcgi?cmd=Retrieve&db=PubMed&dopt=Citation&listuids=24646412)  
469 [uids=24646412](http://www.ncbi.nlm.nih.gov/entrez/query.fcgi?cmd=Retrieve&db=PubMed&dopt=Citation&listuids=24646412)
- 470 Kothmann, W. W., Li, X., Burr, G. S., & O'Brien, J. (2007). Connexin 35/36 is phosphorylated at regulatory  
471 sites in the retina. *Vis Neurosci*, *24*(3), 363-375. doi:10.1017/S095252380707037X
- 472 Kraus, R. L., Li, Y., Gregan, Y., Gotter, A. L., Uebele, V. N., Fox, S. V., . . . Renger, J. J. (2010). In vitro  
473 characterization of T-type calcium channel antagonist TTA-A2 and in vivo effects on arousal in  
474 mice. *J Pharmacol Exp Ther*, *335*(2), 409-417. doi:10.1124/jpet.110.171058
- 475 Landisman, C. E., & Connors, B. W. (2005). Long-term modulation of electrical synapses in the  
476 mammalian thalamus. *Science*, *310*(5755), 1809-1813. Retrieved from  
477 [http://www.ncbi.nlm.nih.gov/entrez/query.fcgi?cmd=Retrieve&db=PubMed&dopt=Citation&list](http://www.ncbi.nlm.nih.gov/entrez/query.fcgi?cmd=Retrieve&db=PubMed&dopt=Citation&listuids=16357260)  
478 [uids=16357260](http://www.ncbi.nlm.nih.gov/entrez/query.fcgi?cmd=Retrieve&db=PubMed&dopt=Citation&listuids=16357260)
- 479 Landisman, C. E., Long, M. A., Beierlein, M., Deans, M. R., Paul, D. L., & Connors, B. W. (2002). Electrical  
480 synapses in the thalamic reticular nucleus. *J Neurosci*, *22*(3), 1002-1009. Retrieved from  
481 [http://www.ncbi.nlm.nih.gov/entrez/query.fcgi?cmd=Retrieve&db=PubMed&dopt=Citation&list](http://www.ncbi.nlm.nih.gov/entrez/query.fcgi?cmd=Retrieve&db=PubMed&dopt=Citation&listuids=11826128)  
482 [uids=11826128](http://www.ncbi.nlm.nih.gov/entrez/query.fcgi?cmd=Retrieve&db=PubMed&dopt=Citation&listuids=11826128)
- 483 Lefler, Y., Yarom, Y., & Uusisaari, M. Y. (2014). Cerebellar inhibitory input to the inferior olive decreases  
484 electrical coupling and blocks subthreshold oscillations. *Neuron*, *81*(6), 1389-1400. Retrieved  
485 from  
486 [http://www.ncbi.nlm.nih.gov/entrez/query.fcgi?cmd=Retrieve&db=PubMed&dopt=Citation&list](http://www.ncbi.nlm.nih.gov/entrez/query.fcgi?cmd=Retrieve&db=PubMed&dopt=Citation&listuids=24656256)  
487 [uids=24656256](http://www.ncbi.nlm.nih.gov/entrez/query.fcgi?cmd=Retrieve&db=PubMed&dopt=Citation&listuids=24656256)
- 488 Lisman, J. (1989). A mechanism for the Hebb and the anti-Hebb processes underlying learning and  
489 memory. *Proc Natl Acad Sci U S A*, *86*(23), 9574-9578. Retrieved from  
490 <http://www.ncbi.nlm.nih.gov/pubmed/2556718>
- 491 Lisman, J. E. (2001). Three Ca<sup>2+</sup> levels affect plasticity differently: the LTP zone, the LTD zone and no  
492 man's land. *J Physiol*, *532*(Pt 2), 285. Retrieved from  
493 <http://www.ncbi.nlm.nih.gov/pubmed/11306649>
- 494 Lynn, B. D., Li, X., Hormuzdi, S. G., Griffiths, E. K., McGlade, C. J., & Nagy, J. I. (2018). E3 ubiquitin ligases  
495 LNX1 and LNX2 localize at neuronal gap junctions formed by connexin36 in rodent brain and  
496 molecularly interact with connexin36. *Eur J Neurosci*. doi:10.1111/ejn.14198
- 497 Malenka, R. C., & Bear, M. F. (2004). LTP and LTD: an embarrassment of riches. *Neuron*, *44*(1), 5-21.  
498 Retrieved from  
499 [http://www.ncbi.nlm.nih.gov/entrez/query.fcgi?cmd=Retrieve&db=PubMed&dopt=Citation&list](http://www.ncbi.nlm.nih.gov/entrez/query.fcgi?cmd=Retrieve&db=PubMed&dopt=Citation&listuids=15450156)  
500 [uids=15450156](http://www.ncbi.nlm.nih.gov/entrez/query.fcgi?cmd=Retrieve&db=PubMed&dopt=Citation&listuids=15450156)
- 501 Malenka, R. C., Kauer, J. A., Perkel, D. J., & Nicoll, R. A. (1989). The impact of postsynaptic calcium on  
502 synaptic transmission--its role in long-term potentiation. *Trends Neurosci*, *12*(11), 444-450.

- 503 Retrieved from  
504 [http://www.ncbi.nlm.nih.gov/entrez/query.fcgi?cmd=Retrieve&db=PubMed&dopt=Citation&list](http://www.ncbi.nlm.nih.gov/entrez/query.fcgi?cmd=Retrieve&db=PubMed&dopt=Citation&list_uids=2479146)  
505 [uids=2479146](http://www.ncbi.nlm.nih.gov/entrez/query.fcgi?cmd=Retrieve&db=PubMed&dopt=Citation&list_uids=2479146)
- 506 Marsh, A. J., Michel, J. C., Adke, A. P., Heckman, E. L., & Miller, A. C. (2017). Asymmetry of an  
507 Intracellular Scaffold at Vertebrate Electrical Synapses. *Curr Biol*, 27(22), 3561-3567 e3564.  
508 doi:10.1016/j.cub.2017.10.011
- 509 Mathy, A., Clark, B. A., & Hausser, M. (2014). Synaptically induced long-term modulation of electrical  
510 coupling in the inferior olive. *Neuron*, 81(6), 1290-1296. Retrieved from  
511 [http://www.ncbi.nlm.nih.gov/entrez/query.fcgi?cmd=Retrieve&db=PubMed&dopt=Citation&list](http://www.ncbi.nlm.nih.gov/entrez/query.fcgi?cmd=Retrieve&db=PubMed&dopt=Citation&list_uids=24656251)  
512 [uids=24656251](http://www.ncbi.nlm.nih.gov/entrez/query.fcgi?cmd=Retrieve&db=PubMed&dopt=Citation&list_uids=24656251)
- 513 McAlonan, K., Cavanaugh, J., & Wurtz, R. H. (2006). Attentional modulation of thalamic reticular  
514 neurons. *J Neurosci*, 26(16), 4444-4450. Retrieved from  
515 [http://www.ncbi.nlm.nih.gov/entrez/query.fcgi?cmd=Retrieve&db=PubMed&dopt=Citation&list](http://www.ncbi.nlm.nih.gov/entrez/query.fcgi?cmd=Retrieve&db=PubMed&dopt=Citation&list_uids=16624964)  
516 [uids=16624964](http://www.ncbi.nlm.nih.gov/entrez/query.fcgi?cmd=Retrieve&db=PubMed&dopt=Citation&list_uids=16624964)
- 517 McCormick, D. A., & Bal, T. (1997). Sleep and arousal: thalamocortical mechanisms. *Annu Rev Neurosci*,  
518 20, 185-215. doi:10.1146/annurev.neuro.20.1.185
- 519 McMahan, D. G., Knapp, A. G., & Dowling, J. E. (1989). Horizontal cell gap junctions: single-channel  
520 conductance and modulation by dopamine. *Proc Natl Acad Sci U S A*, 86(19), 7639-7643.  
521 Retrieved from  
522 [http://www.ncbi.nlm.nih.gov/entrez/query.fcgi?cmd=Retrieve&db=PubMed&dopt=Citation&list](http://www.ncbi.nlm.nih.gov/entrez/query.fcgi?cmd=Retrieve&db=PubMed&dopt=Citation&list_uids=2477845)  
523 [uids=2477845](http://www.ncbi.nlm.nih.gov/entrez/query.fcgi?cmd=Retrieve&db=PubMed&dopt=Citation&list_uids=2477845)
- 524 Otsuka, T., & Kawaguchi, Y. (2013). Common excitatory synaptic inputs to electrically connected cortical  
525 fast-spiking cell networks. *J Neurophysiol*, 110(4), 795-806. doi:10.1152/jn.00071.2013
- 526 Pereda, A. E., & Faber, D. S. (1996). Activity-dependent short-term enhancement of intercellular  
527 coupling. *J Neurosci*, 16(3), 983-992. Retrieved from  
528 [http://www.ncbi.nlm.nih.gov/entrez/query.fcgi?cmd=Retrieve&db=PubMed&dopt=Citation&list](http://www.ncbi.nlm.nih.gov/entrez/query.fcgi?cmd=Retrieve&db=PubMed&dopt=Citation&list_uids=8558267)  
529 [uids=8558267](http://www.ncbi.nlm.nih.gov/entrez/query.fcgi?cmd=Retrieve&db=PubMed&dopt=Citation&list_uids=8558267)
- 530 Pernelle, G., Nicola, W., & Clopath, C. (2018). Gap junction plasticity as a mechanism to regulate  
531 network-wide oscillations. *PLoS Comput Biol*, 14(3), e1006025.  
532 doi:10.1371/journal.pcbi.1006025
- 533 Pfeuty, B., Mato, G., Golomb, D., & Hansel, D. (2005). The combined effects of inhibitory and electrical  
534 synapses in synchrony. *Neural Comput*, 17(3), 633-670. Retrieved from  
535 [http://www.ncbi.nlm.nih.gov/entrez/query.fcgi?cmd=Retrieve&db=PubMed&dopt=Citation&list](http://www.ncbi.nlm.nih.gov/entrez/query.fcgi?cmd=Retrieve&db=PubMed&dopt=Citation&list_uids=15802009)  
536 [uids=15802009](http://www.ncbi.nlm.nih.gov/entrez/query.fcgi?cmd=Retrieve&db=PubMed&dopt=Citation&list_uids=15802009)
- 537 Pham, T., & Haas, J. S. (2018). Electrical synapses between inhibitory neurons shape the responses of  
538 principal neurons to transient inputs in the thalamus: a modeling study. *Sci Rep*, 8(1), 7763.  
539 doi:10.1038/s41598-018-25956-x
- 540 Pham, T., & Haas, J. S. (2019). Electrical synapses regulate both subthreshold integration and population  
541 activity of principal cells in response to transient inputs within canonical feedforward circuits.  
542 *PLoS Comput Biol*, 15(2), e1006440. doi:10.1371/journal.pcbi.1006440
- 543 Pinault, D. (2004). The thalamic reticular nucleus: structure, function and concept. *Brain Res Brain Res*  
544 *Rev*, 46(1), 1-31. doi:10.1016/j.brainresrev.2004.04.008
- 545 Sevetson, J., Fittro, S., Heckman, E., & Haas, J. S. (2017). A calcium-dependent pathway underlies  
546 activity-dependent plasticity of electrical synapses in the thalamic reticular nucleus. *J Physiol*,  
547 595(13), 4417-4430. doi:10.1113/JP274049
- 548 Sevetson, J., & Haas, J. S. (2015). Asymmetry and modulation of spike timing in electrically coupled  
549 neurons. *J Neurophysiol*, jn 00843 02014. Retrieved from



- 550 [http://www.ncbi.nlm.nih.gov/entrez/query.fcgi?cmd=Retrieve&db=PubMed&dopt=Citation&list](http://www.ncbi.nlm.nih.gov/entrez/query.fcgi?cmd=Retrieve&db=PubMed&dopt=Citation&list_uids=25540226)  
551 [uids=25540226](http://www.ncbi.nlm.nih.gov/entrez/query.fcgi?cmd=Retrieve&db=PubMed&dopt=Citation&list_uids=25540226)
- 552 Sherman, S. M. (2016). Thalamus plays a central role in ongoing cortical functioning. *Nat Neurosci*, 19(4),  
553 533-541. doi:10.1038/nn.4269
- 554 Snipas, M., Rimkute, L., Kraujalis, T., Maciunas, K., & Bukauskas, F. F. (2017). Functional asymmetry and  
555 plasticity of electrical synapses interconnecting neurons through a 36-state model of gap  
556 junction channel gating. *PLoS Comput Biol*, 13(4), e1005464. doi:10.1371/journal.pcbi.1005464
- 557 Sorokin, J. M., Davidson, T. J., Frechette, E., Abramian, A. M., Deisseroth, K., Huguenard, J. R., & Paz, J. T.  
558 (2017). Bidirectional Control of Generalized Epilepsy Networks via Rapid Real-Time Switching of  
559 Firing Mode. *Neuron*, 93(1), 194-210. doi:10.1016/j.neuron.2016.11.026
- 560 Soto-Sanchez, C., Wang, X., Vaingankar, V., Sommer, F. T., & Hirsch, J. A. (2017). Spatial scale of  
561 receptive fields in the visual sector of the cat thalamic reticular nucleus. *Nat Commun*, 8(1), 800.  
562 doi:10.1038/s41467-017-00762-7
- 563 Srinivas, M., Rozental, R., Kojima, T., Dermietzel, R., Mehler, M., Condorelli, D. F., . . . Spray, D. C. (1999).  
564 Functional properties of channels formed by the neuronal gap junction protein connexin36. *J*  
565 *Neurosci*, 19(22), 9848-9855. Retrieved from  
566 [http://www.ncbi.nlm.nih.gov/entrez/query.fcgi?cmd=Retrieve&db=PubMed&dopt=Citation&list](http://www.ncbi.nlm.nih.gov/entrez/query.fcgi?cmd=Retrieve&db=PubMed&dopt=Citation&list_uids=10559394)  
567 [uids=10559394](http://www.ncbi.nlm.nih.gov/entrez/query.fcgi?cmd=Retrieve&db=PubMed&dopt=Citation&list_uids=10559394)
- 568 Steriade, M., McCormick, D. A., & Sejnowski, T. J. (1993). Thalamocortical oscillations in the sleeping and  
569 aroused brain. *Science*, 262(5134), 679-685. Retrieved from  
570 [http://www.ncbi.nlm.nih.gov/entrez/query.fcgi?cmd=Retrieve&db=PubMed&dopt=Citation&list](http://www.ncbi.nlm.nih.gov/entrez/query.fcgi?cmd=Retrieve&db=PubMed&dopt=Citation&list_uids=8235588)  
571 [uids=8235588](http://www.ncbi.nlm.nih.gov/entrez/query.fcgi?cmd=Retrieve&db=PubMed&dopt=Citation&list_uids=8235588)
- 572 Turecek, J., Yuen, G. S., Han, V. Z., Zeng, X. H., Bayer, K. U., & Welsh, J. P. (2014). NMDA receptor  
573 activation strengthens weak electrical coupling in mammalian brain. *Neuron*, 81(6), 1375-1388.  
574 Retrieved from  
575 [http://www.ncbi.nlm.nih.gov/entrez/query.fcgi?cmd=Retrieve&db=PubMed&dopt=Citation&list](http://www.ncbi.nlm.nih.gov/entrez/query.fcgi?cmd=Retrieve&db=PubMed&dopt=Citation&list_uids=24656255)  
576 [uids=24656255](http://www.ncbi.nlm.nih.gov/entrez/query.fcgi?cmd=Retrieve&db=PubMed&dopt=Citation&list_uids=24656255)
- 577 Vervaeke, K., Lorincz, A., Gleeson, P., Farinella, M., Nusser, Z., & Silver, R. A. (2010). Rapid  
578 desynchronization of an electrically coupled interneuron network with sparse excitatory  
579 synaptic input. *Neuron*, 67(3), 435-451. Retrieved from  
580 [http://www.ncbi.nlm.nih.gov/entrez/query.fcgi?cmd=Retrieve&db=PubMed&dopt=Citation&list](http://www.ncbi.nlm.nih.gov/entrez/query.fcgi?cmd=Retrieve&db=PubMed&dopt=Citation&list_uids=20696381)  
581 [uids=20696381](http://www.ncbi.nlm.nih.gov/entrez/query.fcgi?cmd=Retrieve&db=PubMed&dopt=Citation&list_uids=20696381)
- 582 Wang, X. J., & Rinzel, J. (1993). Spindle rhythmicity in the reticularis thalami nucleus: synchronization  
583 among mutually inhibitory neurons. *Neuroscience*, 53(4), 899-904. Retrieved from  
584 [http://www.ncbi.nlm.nih.gov/entrez/query.fcgi?cmd=Retrieve&db=PubMed&dopt=Citation&list](http://www.ncbi.nlm.nih.gov/entrez/query.fcgi?cmd=Retrieve&db=PubMed&dopt=Citation&list_uids=8389430)  
585 [uids=8389430](http://www.ncbi.nlm.nih.gov/entrez/query.fcgi?cmd=Retrieve&db=PubMed&dopt=Citation&list_uids=8389430)
- 586 Welzel, G., & Schuster, S. (2018). Long-term potentiation in an innexin-based electrical synapse.  
587 *Scientific Reports*, 8. doi:ARTN 12579  
10.1038/s41598-018-30966-w
- 588 10.1038/s41598-018-30966-w
- 589 Whittington, M. A., & Traub, R. D. (2003). Interneuron diversity series: inhibitory interneurons and  
590 network oscillations in vitro. *Trends Neurosci*, 26(12), 676-682. Retrieved from  
591 [http://www.ncbi.nlm.nih.gov/entrez/query.fcgi?cmd=Retrieve&db=PubMed&dopt=Citation&list](http://www.ncbi.nlm.nih.gov/entrez/query.fcgi?cmd=Retrieve&db=PubMed&dopt=Citation&list_uids=14624852)  
592 [uids=14624852](http://www.ncbi.nlm.nih.gov/entrez/query.fcgi?cmd=Retrieve&db=PubMed&dopt=Citation&list_uids=14624852)
- 593 Yang, X. D., Korn, H., & Faber, D. S. (1990). Long-term potentiation of electrotonic coupling at mixed  
594 synapses. *Nature*, 348(6301), 542-545. Retrieved from  
595 [http://www.ncbi.nlm.nih.gov/entrez/query.fcgi?cmd=Retrieve&db=PubMed&dopt=Citation&list](http://www.ncbi.nlm.nih.gov/entrez/query.fcgi?cmd=Retrieve&db=PubMed&dopt=Citation&list_uids=2174130)  
596 [uids=2174130](http://www.ncbi.nlm.nih.gov/entrez/query.fcgi?cmd=Retrieve&db=PubMed&dopt=Citation&list_uids=2174130)

- 597 Yao, X., Cafaro, J., McLaughlin, A. J., Postma, F. R., Paul, D. L., Awatramani, G., & Field, G. D. (2018). Gap  
598 Junctions Contribute to Differential Light Adaptation across Direction-Selective Retinal Ganglion  
599 Cells. *Neuron*, *100*(1), 216-228 e216. doi:10.1016/j.neuron.2018.08.021
- 600 Zikopoulos, B., & Barbas, H. (2012). Pathways for emotions and attention converge on the thalamic  
601 reticular nucleus in primates. *J Neurosci*, *32*(15), 5338-5350. Retrieved from  
602 [http://www.ncbi.nlm.nih.gov/entrez/query.fcgi?cmd=Retrieve&db=PubMed&dopt=Citation&list](http://www.ncbi.nlm.nih.gov/entrez/query.fcgi?cmd=Retrieve&db=PubMed&dopt=Citation&list_uids=22496579)  
603 [\\_uids=22496579](http://www.ncbi.nlm.nih.gov/entrez/query.fcgi?cmd=Retrieve&db=PubMed&dopt=Citation&list_uids=22496579)
- 604 Zolnik, T. A., & Connors, B. W. (2016). Electrical synapses and the development of inhibitory circuits in  
605 the thalamus. *J Physiol*, *594*(10), 2579-2592. doi:10.1113/JP271880
- 606
